# Supplementary material
Source: PubMed Central journal article supplement (PMC3282277)
Supplement: 97320630008058S1.pdf [file 97320630008058S1.pdf]

## Supplementary material:

**Table 1:** Showing that cadmium chloride treatment induced significant elevations of tailed cells, tail length, tail DNA %, tail moments and HSP70 in compare to control group. Synchronized exposure to cadmium chloride and L-Carnitine induce significant reduction in DNA damage and HSP70 in compare to cadmium chloride treated group using comet assay.

| Groups             | Tailed Cells% |             | Untailed Cells% |             | Tail length um |                | Tail DNA %     |               | Tail Moment    |                | HSP-70<br>ng/100mg |            |
|--------------------|---------------|-------------|-----------------|-------------|----------------|----------------|----------------|---------------|----------------|----------------|--------------------|------------|
|                    | 10            | 56          | 10              | 56          | 10             | 56             | 10             | 56            | 10             | 56             | 10                 | 56         |
| Control            | 3±1.2         | 2.8±0.5     | 97±2.8          | 97.2±3.9    | 1.26±0.2       | 1.38±0.3       | 1.2±0.2        | 1.27±0.4      | 1.54±0.3       | 1.77±0.1       | 6.31±2.4           | 5.68±1.3   |
| L-Carnitine        | 3.6±1.1       | 3±0.92      | 96.4±4.28       | 97±2.9      | 1.42±0.4       | 1.38±0.2       | 1.34±0.3       | 1.30±0.2      | 1.39±0.4       | 1.62±0.2       | 6.31±2.4           | 7.14±2.5   |
| Cad. Cl            | 15.3<br>2±47* | 22±3.6<br>* | 84.68±3.2<br>*  | 78±4.0<br>* | 4.98±0.2<br>*  | 7.41±1.42<br>* | 5.17±1.21<br>* | 7.38±1.5<br>* | 29.26±39<br>*  | 54.87±5.7<br>* | 27.97±3.7<br>*     | 42.11±3.4* |
| Cad.Cl+L-Carnitine | 13.6±4.2*     | 17±3.5<br>* | 86.4±4.7*<br>*  | 83±3.5<br>* | 4.37±0.3<br>*  | 5.67±1.33<br>* | 4.69±1.0<br>*  | 5.53±0.3<br>* | 22.24±2.7<br>* | 31.40±3.5<br>* | 23.93±2.5<br>*     | 30.11±3.5* |

\* Significant at p<0.05.
